# Supplementary material
Source: PubMed Central journal article supplement (PMC4152379)
Supplement: NIHMS602033-supplement-supplement_1.pdf [file NIHMS602033-supplement-supplement_1.pdf]

**ONLINE SUPPLEMENT**

**Genetic and Environmental Continuity in Personality Development:  
A Meta-Analysis**

Daniel A. Briley & Elliot M. Tucker-Drob

Department of Psychology & Population Research Center  
University of Texas at Austin

Address Correspondences to: Daniel A. Briley, Department of Psychology, University of Texas  
at Austin, 108 E. Dean Keeton Stop A8000, Austin TX 78712-0187. Email:

[daniel.briley@utexas.edu](mailto:daniel.briley@utexas.edu). Phone: (512) 471-1406.

Table S1. Results of continuous exponential models for each developmental outcome based only on self-report data

| Outcome                                       | $b_0$                 | $b_1$                  | $b_2$                  | $b_{\text{time lag}}$ | LL        | AIC      | BIC      |
|-----------------------------------------------|-----------------------|------------------------|------------------------|-----------------------|-----------|----------|----------|
| Heritability                                  | .399<br>(.073)<br>*** | -.108<br>(.159)        | -.043<br>(.145)        | -                     | -865.505  | 1737.011 | 1747.611 |
| Environmentality                              | .610<br>(.082)<br>*** | .121<br>(.090)         | -.033<br>(.086)        | -                     | -875.896  | 1757.792 | 1768.393 |
| Corrected<br>Environmentality                 | .369<br>(.020)<br>*** | 2.131<br>(2.862)       | -.259<br>(.126)<br>*   | -                     | -884.588  | 1775.176 | 1785.777 |
| Phenotypic<br>Stability                       | .709<br>(.028)<br>*** | 1.283<br>(.431)<br>**  | -.120<br>(.027)<br>*** | -.005<br>(.004)       | -1640.088 | 3288.177 | 3300.859 |
| Genetic Stability                             | .996<br>(.008)<br>*** | 1.185<br>(.279)<br>*** | -.111<br>(.018)<br>*** | -.005<br>(.004)       | -1380.600 | 2769.200 | 2781.882 |
| Environmental<br>Stability                    | .593<br>(.051)<br>*** | 1.104<br>(.355)<br>**  | -.084<br>(.028)<br>**  | -.008<br>(.004)<br>*  | -1412.135 | 2832.269 | 2844.951 |
| Corrected<br>Environmental<br>Stability       | .901<br>(.017)<br>*** | 1.598<br>(.357)<br>*** | -.079<br>(.013)<br>*** | -.018<br>(.007)<br>*  | -1328.502 | 2665.003 | 2677.685 |
| Genetic<br>Contribution to<br>Stability       | .395<br>(.016)<br>*** | .393<br>(.145)<br>**   | -.111<br>(.033)<br>**  | .006<br>(.002)<br>*   | -1405.376 | 2818.751 | 2831.433 |
| Environmental<br>Contribution to<br>Stability | .325<br>(.020)<br>*** | .647<br>(.178)<br>***  | -.083<br>(.026)<br>**  | -.007<br>(.004)<br>*  | -1505.100 | 3018.199 | 3030.881 |

Note. \* indicates  $p < .05$ ; \*\* indicates  $p < .01$ ; \*\*\* indicates  $p < .001$ .

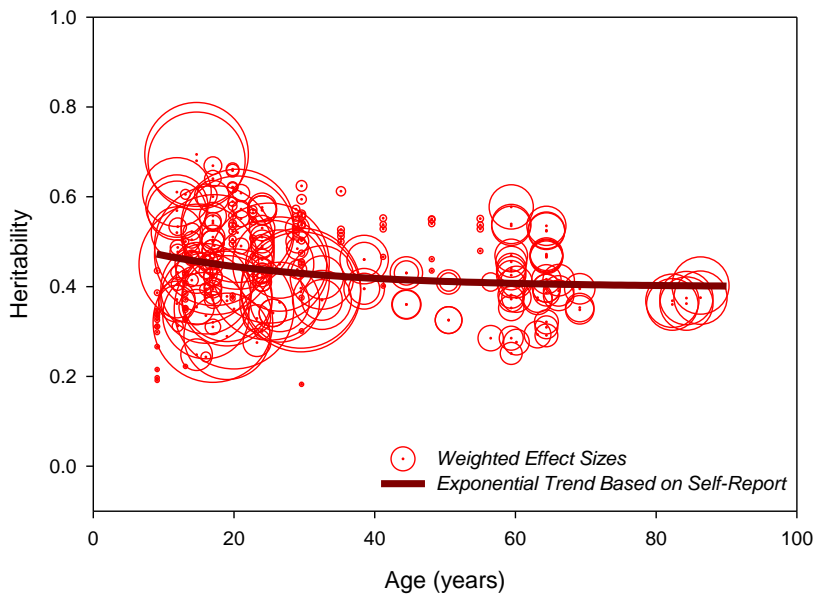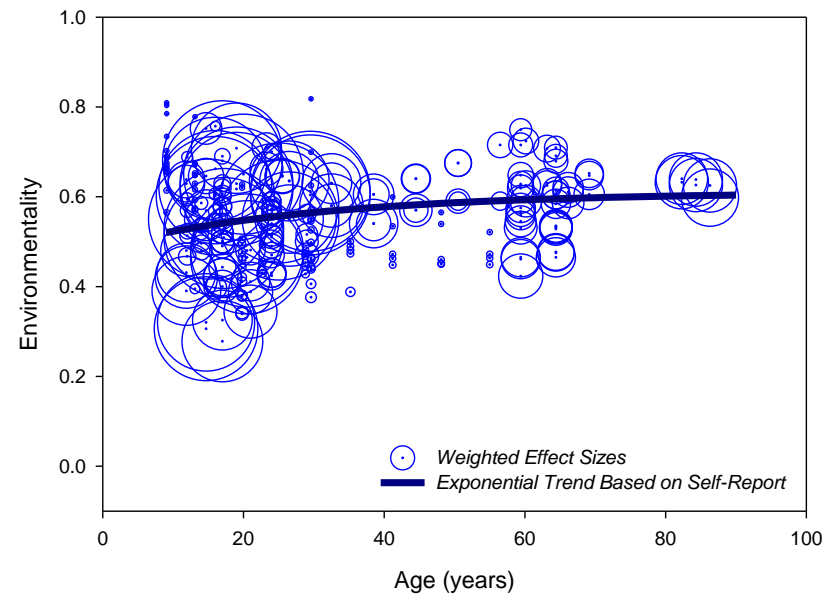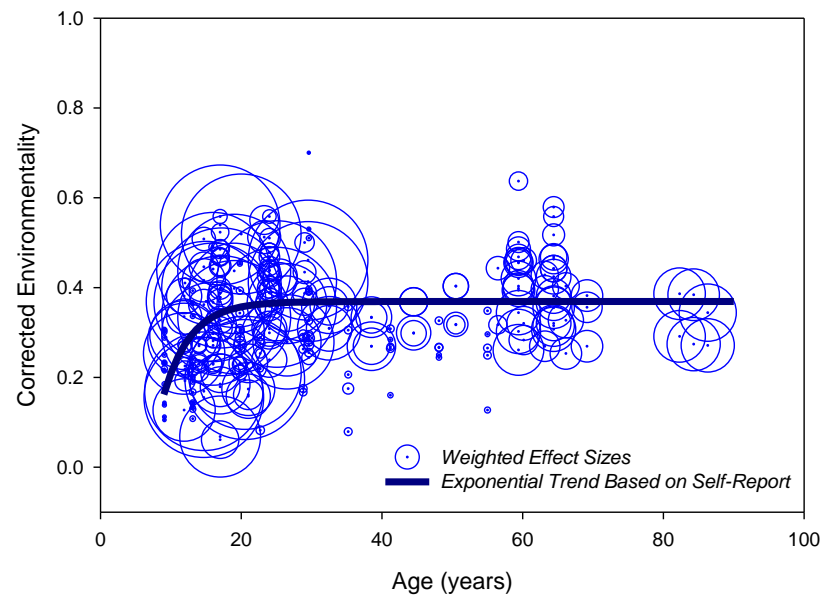

Figure S1. Age-trends in heritability, environmentality, and measurement error corrected environmentality based *only* on self-report data. Circles surrounding data points are scaled by the weighting variable (described in Analytic Approach section) such that larger circles carried *more* weight in the analysis.

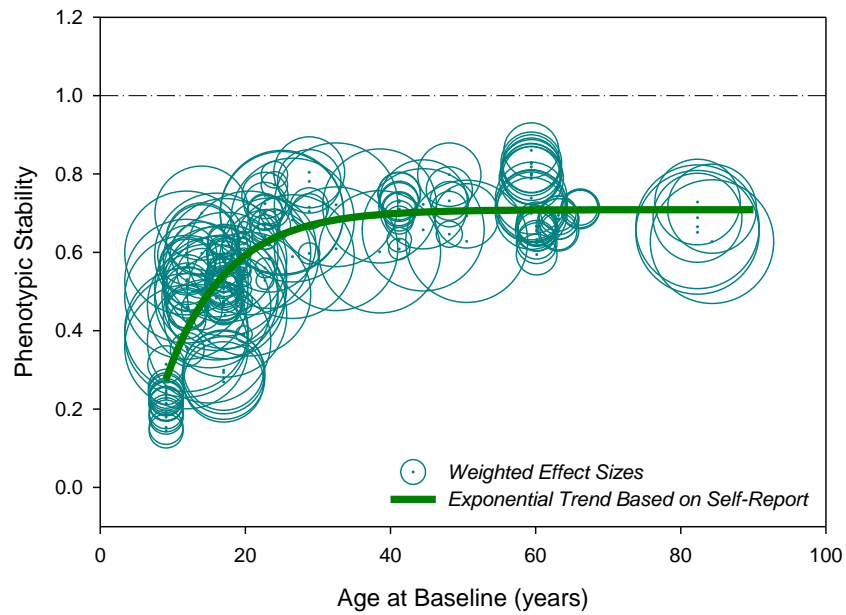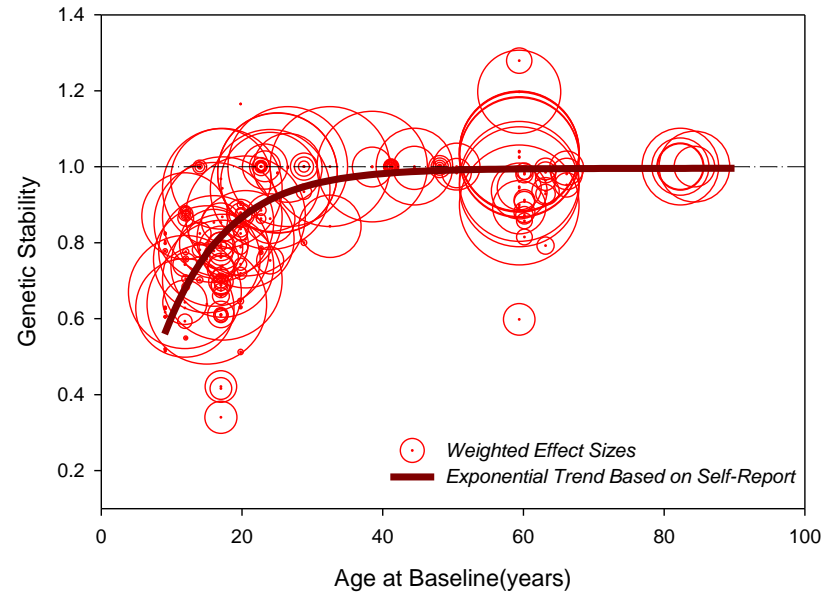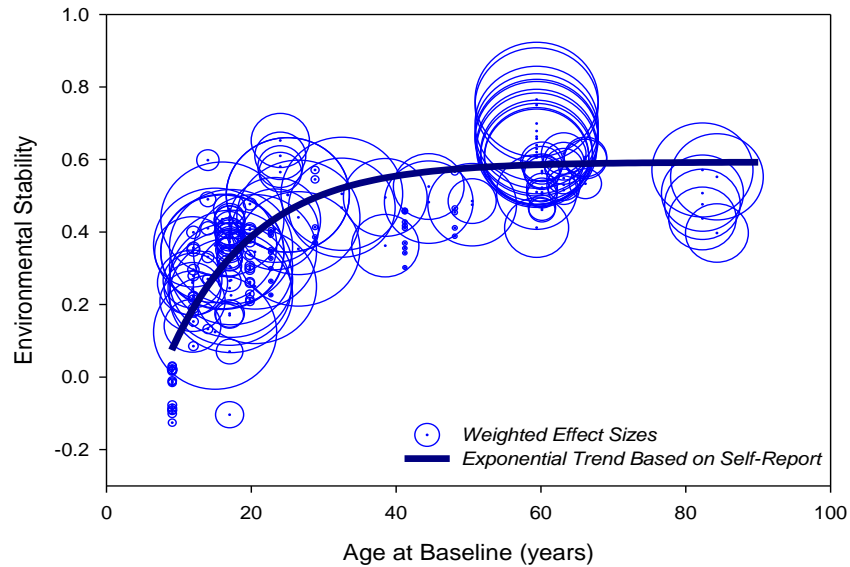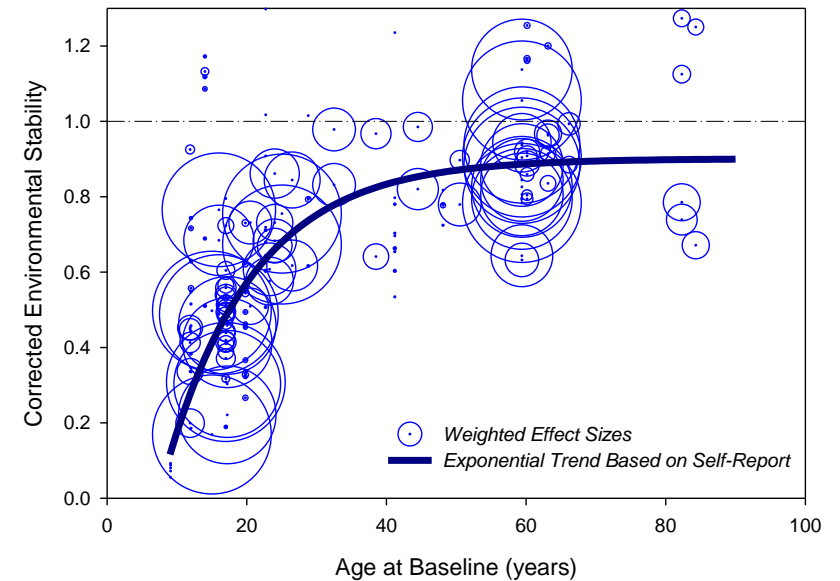

Figure S2. Age-trends in phenotypic, genetic, environmental, and measurement error corrected environmental stability based *only* on self-report data assuming a time lag of 5.56 years. Circles surrounding data points are scaled by the weighting variable (described in Analytic Approach section) such that larger circles carried *more* weight in the analysis.

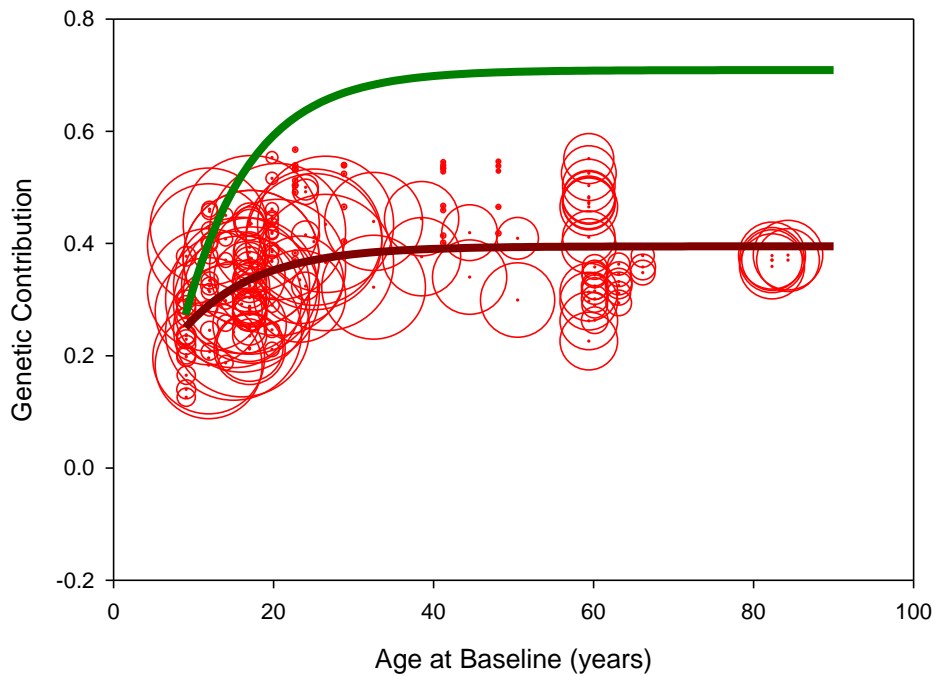

- Weighted Effect Sizes
- Exponential Genetic Contribution Trend Based on Self-Report
- Exponential Phenotypic Stability Trend Based on Self-Report

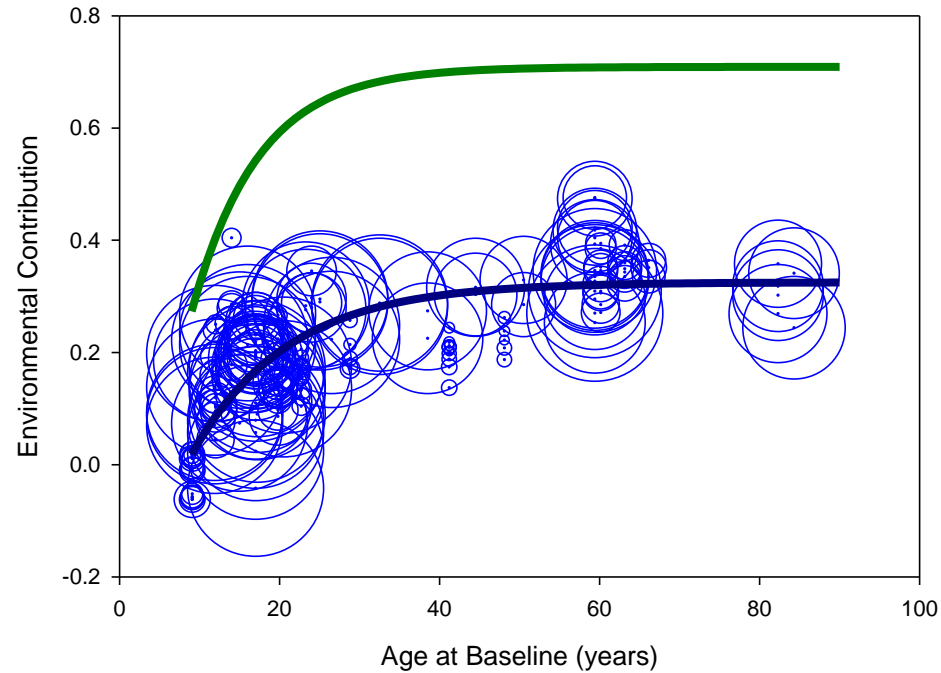

- Weighted Effect Sizes
- Exponential Environmental Contribution Trend Based on Self-Report
- Exponential Phenotypic Stability Trend Based on Self-Report

Figure S3. Age-trends in the genetic and environmental contribution to phenotypic stability based *only* on self-report data assuming a time lag of 5.56 years. Circles surrounding data points are scaled by the weighting variable (described in Analytic Approach section) such that larger circles carried *more* weight in the analysis.
